# Supplementary material for: The leucine-rich region of Flightless I interacts with R-ras to regulate cell extension formation
Source: PubMed Central journal article supplement — Mol Biol Cell. 2018 Oct 1;29(20):2481–93. doi: 10.1091/mbc.E18-03-0147 (PMC6233052; doi:10.1091/mbc.e18-03-0147), 2018-10-01

# Supplemental Materials

*Molecular Biology of the Cell*

Arora et al.

**A** Dermal fibroblasts from knock-out mice showing Flii, G3BP1 and RasGap expression levels

Fibroblasts from KO Mice

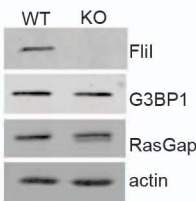

**B** i-Knock-down of G3BP1 expression with 2nd set of siRNA showing 72% decrease in protein levels. ii,iii-Confocal images of Flii WT and KND cells transiently co-transfected with G3BP1 siRNA and fluorescent (siGloDY-547) show 2.5-fold difference in development of cell extensions between control siRNA transfected Flii WT and KND cells ( $p < 0.05$ ).

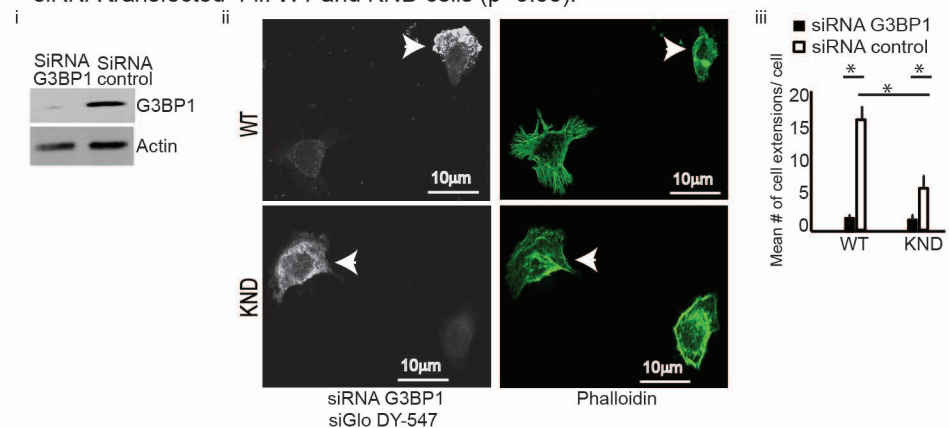

**C** i-Knock-down of RasGap expression with siRNA showing 76% decrease in protein levels of RasGap. ii,iii-Confocal images of Flii WT and KND cells transiently co-transfected with RasGap siRNA and fluorescent siRNA (siGloDY-547) show 2.4 fold difference in development of cell extensions between control siRNA transfected Flii WT and Flii KND cells ( $p < 0.05$ ).

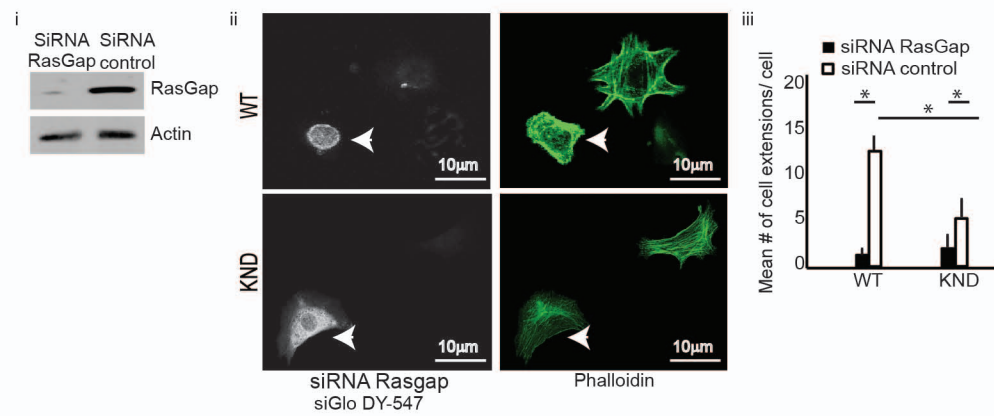

Supplement: mbc-29-2481-s001.pdf [file mbc-29-2481-s001.pdf]
